# Supplementary material
Source: Springer Nature journal article supplement (https://www.springermedizin.de/resource/supplementary/12974_2011_379_MOESM8_ESM.pdf/9601552)

**DMSO**

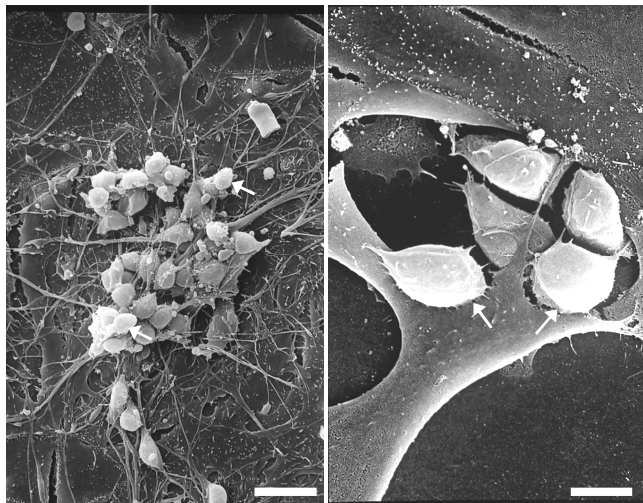

**C16**

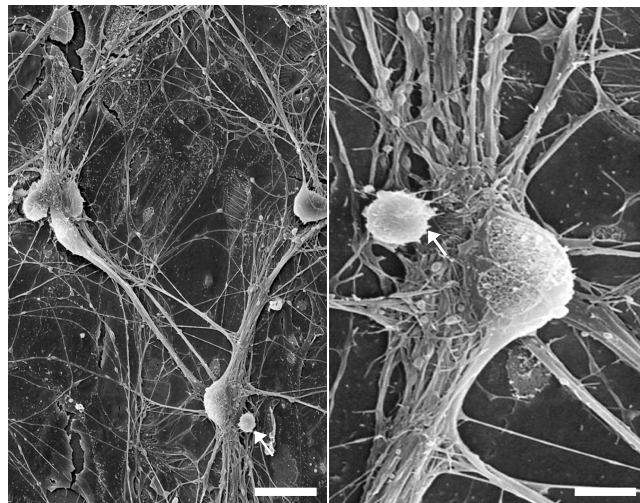

**DMSO + A $\beta$ 42**

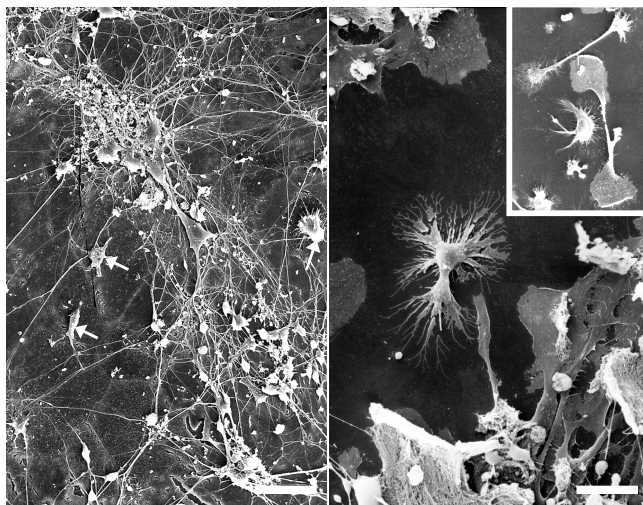

**C16 + A $\beta$ 42**

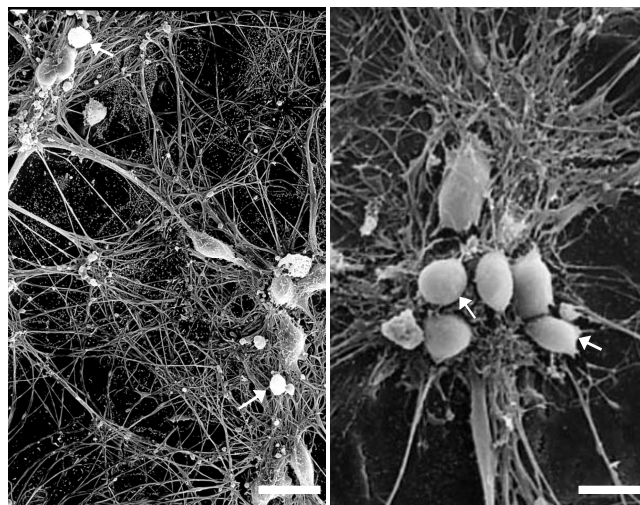

Supplement: MOESM8 [file 9601552]
